# Supplementary material for: Prostaglandin in the ventromedial hypothalamus regulates peripheral glucose metabolism
Source: PubMed Central journal article supplement (PMC8058102; doi:10.1038/s41467-021-22431-6), 2021-04-20
Supplement: 41467_2021_22431_MOESM1_ESM.pdf [file 41467_2021_22431_MOESM1_ESM.pdf]

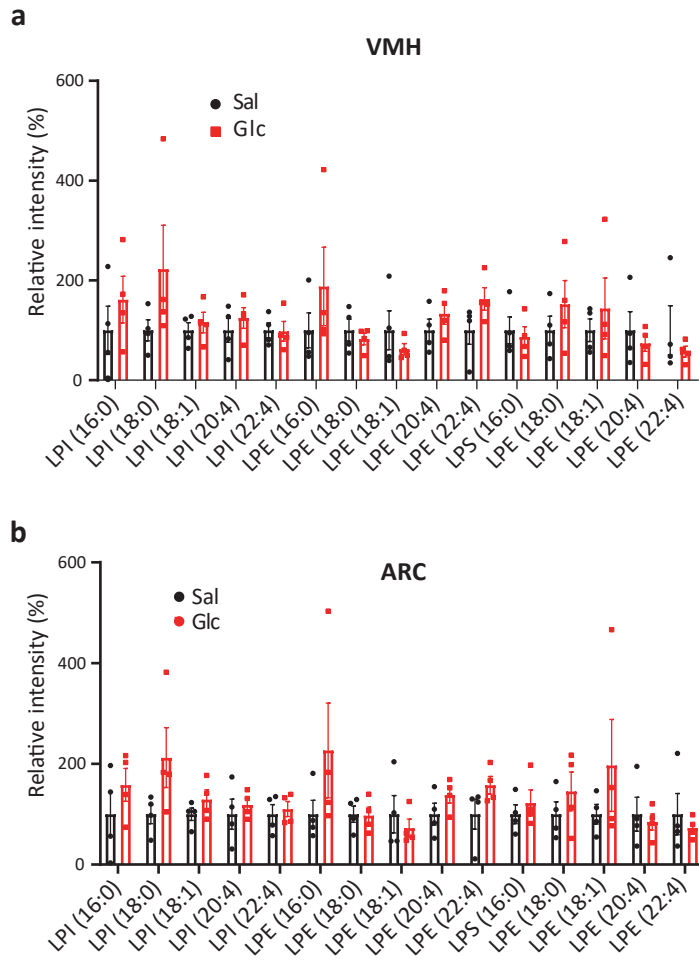

Supplementary Figure 1

Relative intensities of lysospecies in the VMH (a) and ARC (b) by IMS after injection with saline (n=4) or glucose (n=4).

All data represent the mean  $\pm$  SEM. LPI: lysophosphatidylinositol, LPS: lysophosphatidylserine, LPE: lysophosphatidylethanolamine.

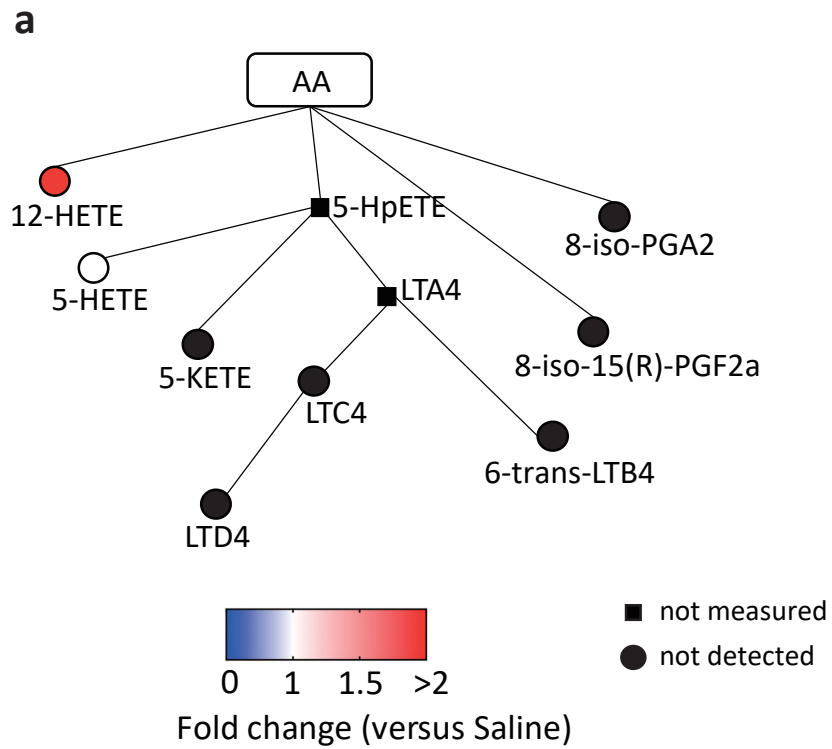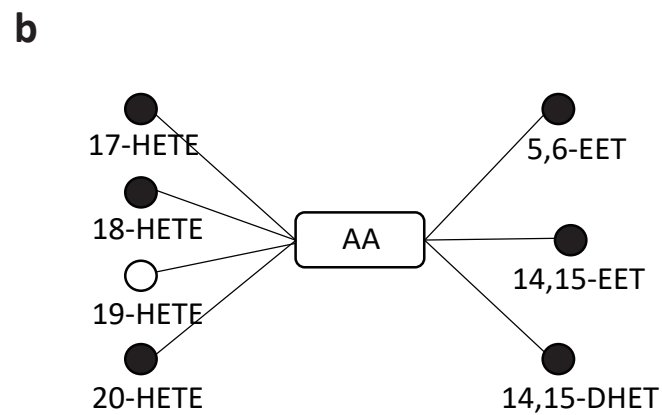

Supplementary Figure 2

Relative amounts of hypothalamic eicosanoids mediated by lipoxygenase (a) or cytochrome P450 (b) after the injection of glucose compared with saline injected mice. n=3 in each experimental group. Data represent the mean fold change in color.

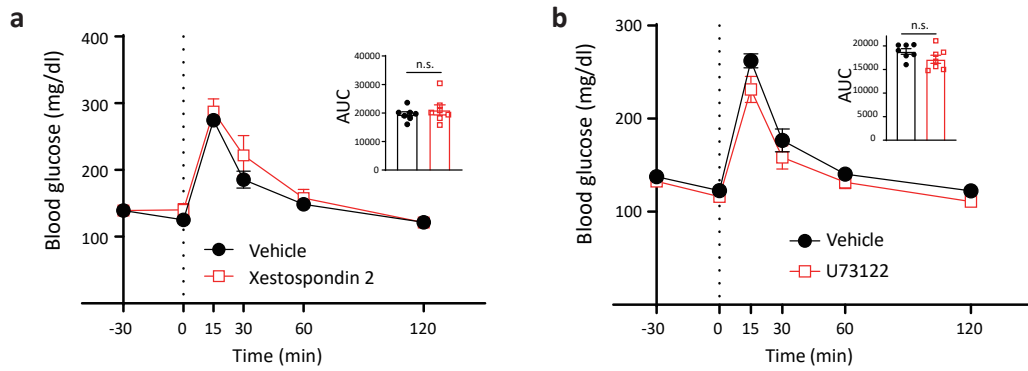

Supplementary Figure 3

Hypothalamic PLC-mediated-pathway does not affect systemic glucose metabolism. (a) Glucose tolerance test (GTT) (0–120 min) after intra-hypothalamic injection (-30 min) of Xestospondin, an IP3 receptor antagonist, (n=7) or vehicle (n=7). (b) GTT (0–120 min) after intra-hypothalamic injection (-30 min) of U73122, a phospholipase C (PLC) inhibitor, (n=7) or vehicle (n=7). All data represent the mean  $\pm$  SEM

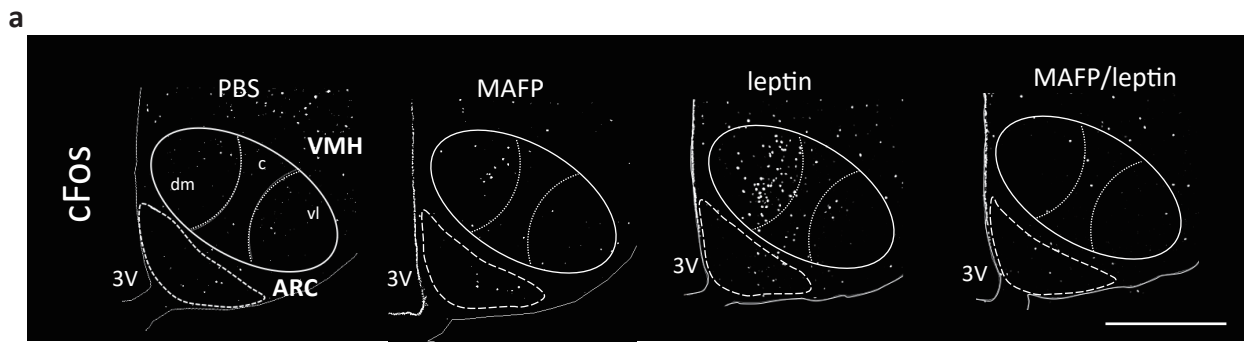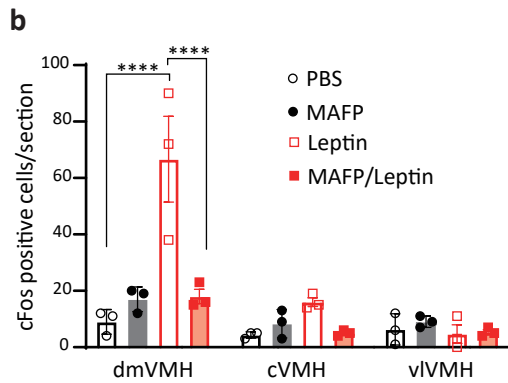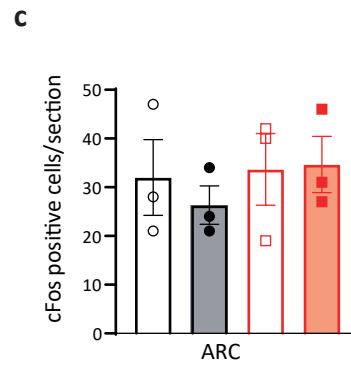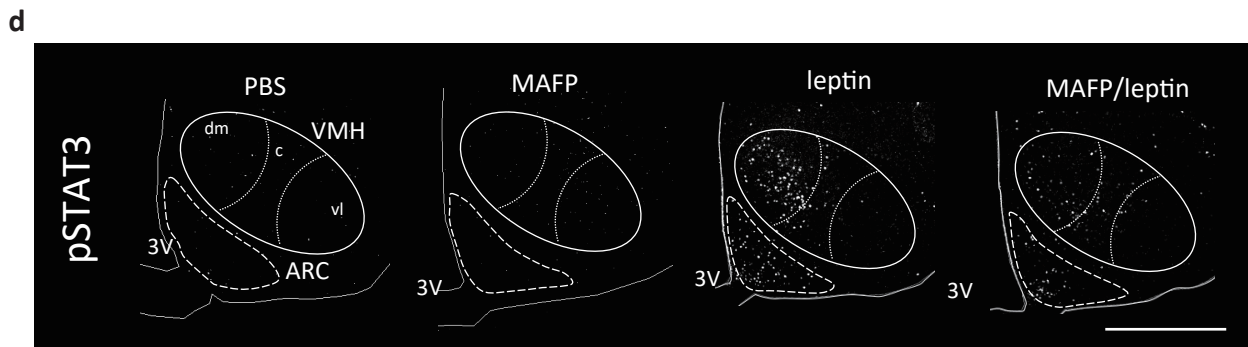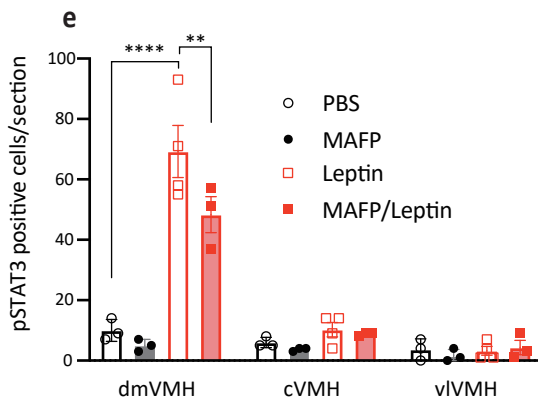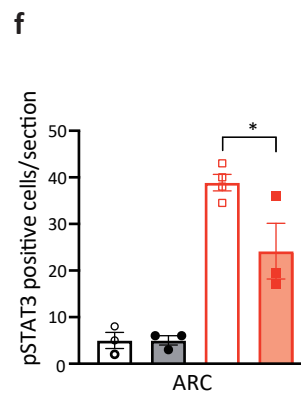

Supplementary Figure 4

Hypothalamic leptin responsiveness is regulated by cPLA2.

a, Representative micrographs showing immunofluorescent cFos staining in the hypothalamus of mice i.c.v. injected with PBS, MAFP, leptin or both MAFP and leptin. Scale bar: 500  $\mu$ m. b, c, Quantification of cFos expression in the dmVMH, cVMH, vVMH (b), and ARC (c) after i.c.v. injection of PBS, MAFP, leptin or both MAFP and leptin (n=3 in each experimental group) (VMH: two-way ANOVA followed by Sidak multiple comparison test, in b,  $p < 0.0001$  PBS vs Leptin,  $p < 0.0001$  Leptin vs MAFP/Leptin.). d, Representative micrographs showing immunofluorescent pSTAT (Tyr 705) staining in the hypothalamus of mice i.c.v. injected with PBS, MAFP, leptin or both MAFP and leptin. Scale bar: 500  $\mu$ m. e, f, Quantification of pSTAT3 (Tyr 705)-positive cells in the dmVMH, cVMH, vVMH (e), and ARC (f) after i.c.v. injection of PBS, MAFP, leptin or both MAFP and leptin (n=4 in each experimental group) (VMH: two-way ANOVA followed by Sidak multiple comparison test, in e,  $p < 0.0001$  Leptin vs PBS,  $p = 0.0095$  Leptin vs MAFP/Leptin. In f, one-way ANOVA followed by Sidak multiple comparison test,  $p = 0.0408$  Leptin vs MAFP/Leptin.).

All data represent the mean  $\pm$  SEM; \* =  $p < 0.05$ ; \*\* =  $p < 0.01$ ; \*\*\* =  $p < 0.001$ ; \*\*\*\* =  $p < 0.0001$ .

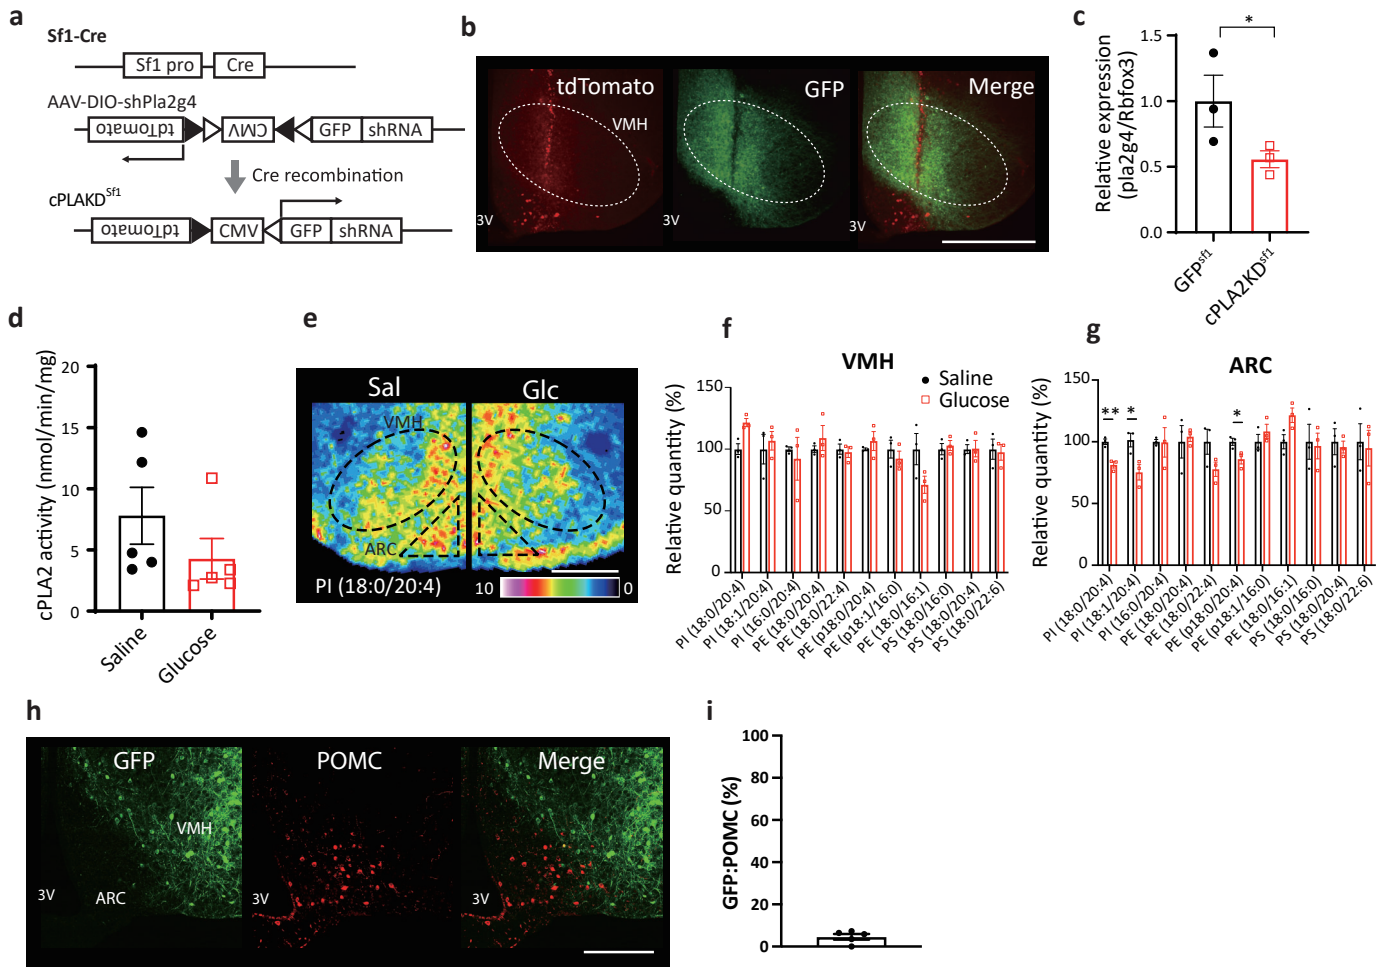

Supplementary Figure 5

a, Construct of AAV8-DIO (CreOn)-shRNA against *mpla2g4*, containing DIO (Double-floxed Inverted Open reading frame) to express shRNA Cre-dependently. b, Representative micrographs showing virus infected (tdTomato) and shRNA expressing (GFP) Sf1-neurons. Scale bar: 500  $\mu$ m. c, Expression of *pla2g4* mRNA in the whole hypothalamus injected with AAV8-DIO-shRNA against *mpla2g4* (cPLA2KD<sup>Sf1</sup>; n=3) compared with control mice (GFP<sup>Sf1</sup>; n=3) (two-tailed t test, p = 0.0497, cPLA2KD<sup>Sf1</sup> vs GFP<sup>Sf1</sup>). d, Enzymatic activity of cPLA2 after injection of saline (n=5) or glucose (2g/kg) (n=5) in C57BL/6J mice. e-g, Distributions of phospholipids in the hypothalamus of cPLA2KD<sup>Sf1</sup> mice after i.p. injection of saline or glucose. e, Representative results of IMS on hypothalamic phosphatidylinositol (PI) (18:0/20:4) of cPLA2KD<sup>Sf1</sup> mice after saline (left half) or glucose injection (right half). Scale bar: 500  $\mu$ m. f, g, Relative intensities of phospholipids in the VMH (f) and ARC (g) of cPLA2KD<sup>Sf1</sup> mice after injection of saline (n=3) or glucose (n=3). (two-tailed t test for each molecule, in g, p = 0.0056 for PI (18:0/20:4), p = 0.0343 for PI (18:1/20:4), p = 0.0453 for PE (p18:0/20:4)). h, Representative micrographs showing immunofluorescence of POMC ( $\alpha$ -MSH) and GFP in Sf1-cre mice injected with AAV-DIO-GFP. Scale bar: 200  $\mu$ m. i, Ratio of GFP expressed POMC neurons (n=5). All data represent the mean  $\pm$  SEM; \* = p<0.05; \*\* = p<0.01

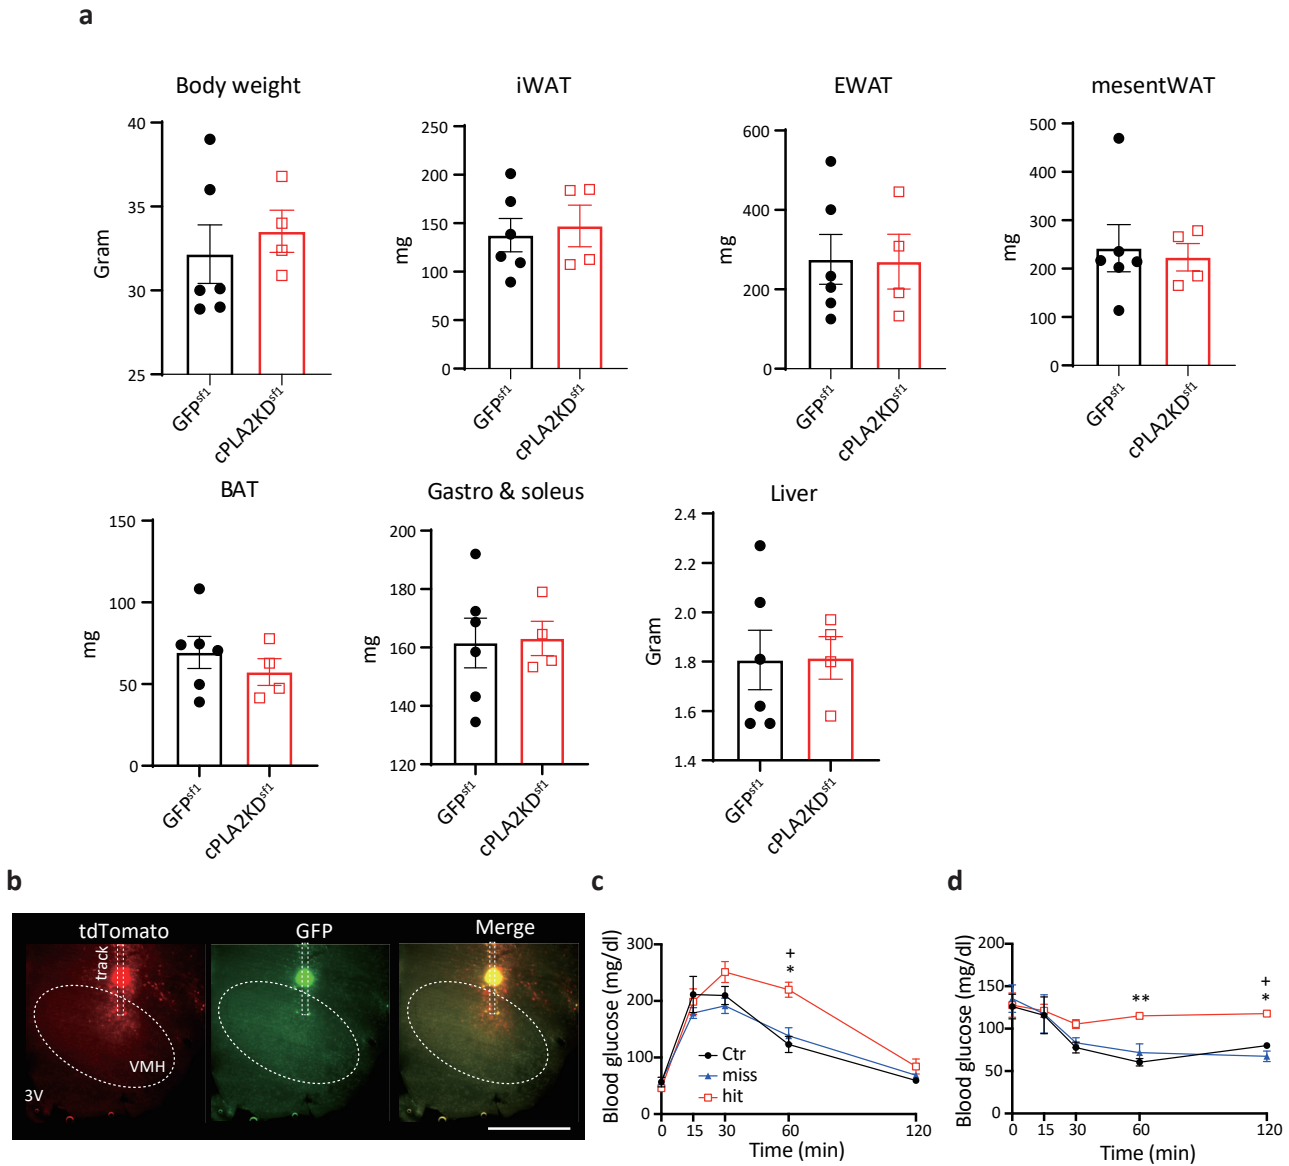

Supplementary Figure 6

a, Body weight and tissue weight in cPLA2KD<sup>Sf1</sup> mice (n=4) and GFP<sup>Sf1</sup> mice (n=5) 8 weeks after the AAV injection. (iWAT: inguinal white adipose tissue. EWAT: epididymal white adipose tissue. mesentWAT: mesenteric white adipose tissue. BAT: brown adipose tissue). b-d, Phenotype of mice with “hit” and “miss” injection of AAV8-DIO-shRNA against *mpla2g4* into the VMH in Sf1-cre mice. b, Representative micrographs showing the “miss” injection of virus into the VMH. c, Glucose tolerance test on the Sf1-cre mice received “miss” (n=3) or “hit” (n=4) injection of AAV8-DIO-shRNA against *mpla2g4* or hit injection of AAV-DIO-GFP (Ctr) (n=3) (two-way ANOVA followed by Sidak multiple comparison test, p = 0.0156 at time = 60 Ctr vs hit, p = 0.0302 at time =60 miss vs hit). d, Insulin tolerance test on the mice receive “miss” (n=3) or “hit” (n=3) injection or hit injection of AAV-DIO-GFP (Ctr) (n=3) (two-way ANOVA followed by Sidak multiple comparison test, p = 0.0022 at time = 60 Ctr vs hit, p = 0.0117 at time = 120 Ctr vs hit, p = 0.0141 at time = 120, miss vs hit). Data represent the mean ± SEM. \* = p<0.05 (Ctr versus hit) ; \*\* = p<0.01 (Ctr versus hit) ; + = p<0.05 (hit versus miss).

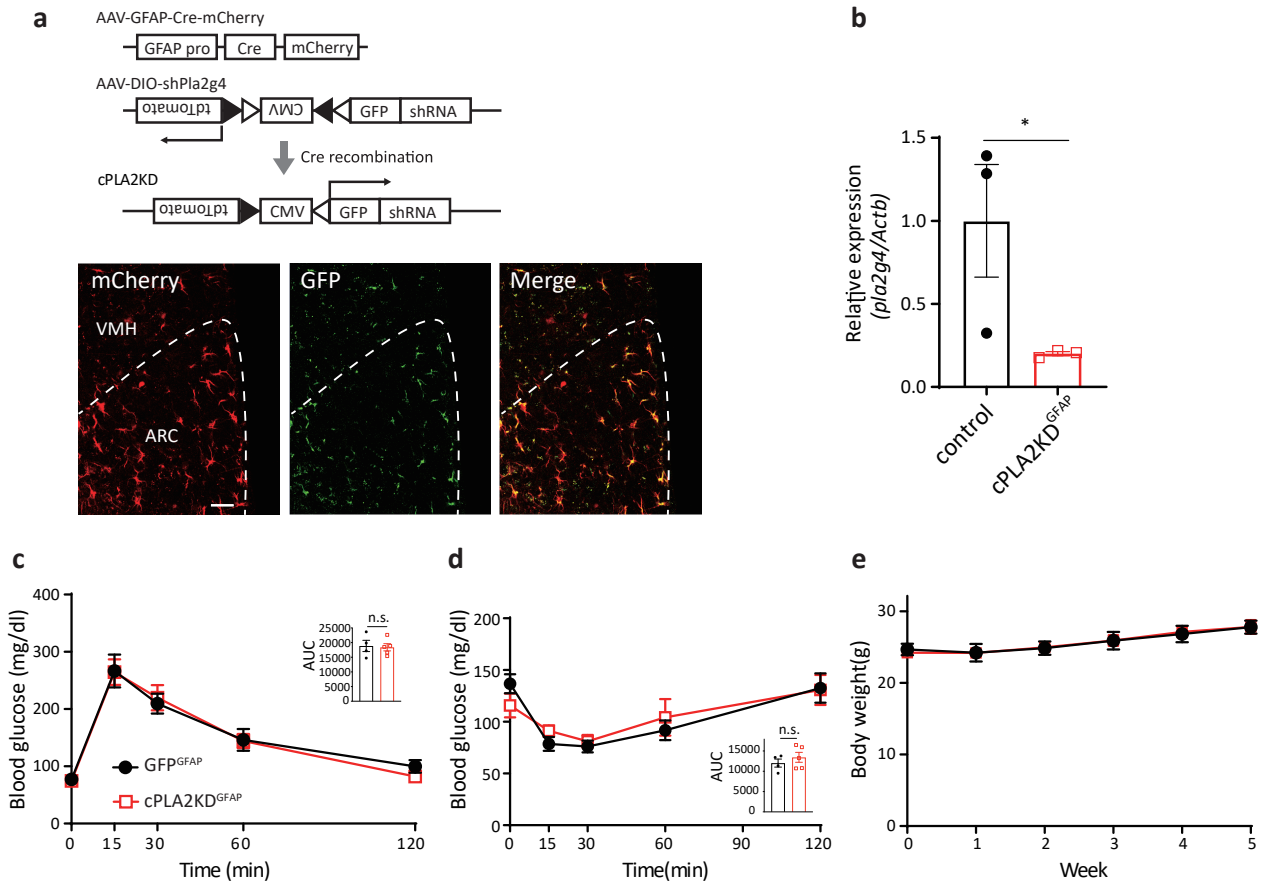

Supplementary Figure 7

Knockdown of astrocytic cPLA2 in hypothalamus (cPLA2KD<sup>GFAP</sup>) did not change body weight and glucose metabolism.

a, Construct of AAV8-GFAP-Cre-mCherry and AAV8-DIO-shRNA against *mpla2g4* and representative micrographs showing virus infected (tdTomato) and shRNA expressing (GFP) astrocytes in the ARC. Scale bar: 25  $\mu$ m. b, Relative expression of cPLA2 in the hypothalamus of cPLA2KD<sup>GFAP</sup> and control mice. n=3 in each experimental group (two-tailed t test, p = 0.039, Ctr vs cPLA2KD<sup>GFAP</sup>). c, Glucose tolerance test in cPLA2KD<sup>GFAP</sup> mice (n=5) and GFP<sup>GFAP</sup> mice (n=4). d, Insulin tolerance test in cPLA2KD<sup>GFAP</sup> mice (n=5) and GFP<sup>GFAP</sup> mice (n=4). e, Body weight change in cPLA2KD<sup>GFAP</sup> mice (n=5) and GFP<sup>GFAP</sup> mice (n=4) after viral injection. All data represent the mean  $\pm$  SEM. \* = p<0.05

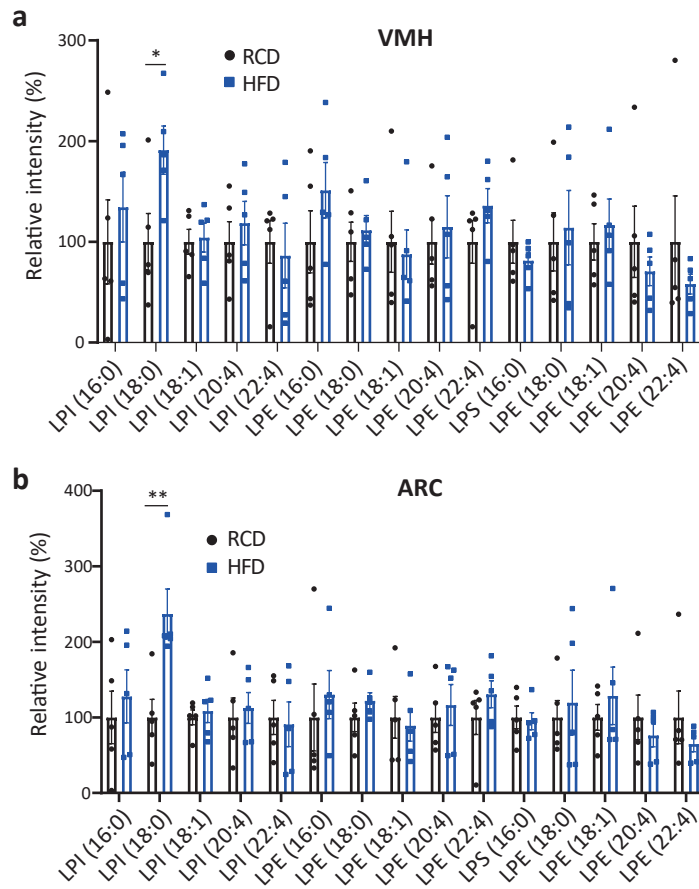

Supplementary Figure 8

Relative intensities of lipospecies in the VMH (a) and ARC (b) by IMS from RCD (n=5) or HFD(n=5) fed mice. (two-tailed t test for each molecule, LPI(18:0) in VMH,  $p = 0.0389$  RCD vs HFD, in ARC  $p=0.0099$  RCD vs HFD).

All data represent the mean  $\pm$  SEM; \* =  $p < 0.05$ ; \*\* =  $p < 0.01$ .

LPI: lysophosphatidylinositol, LPS: lysophosphatidylserine, LPE: lysophosphatidylethanolamine.



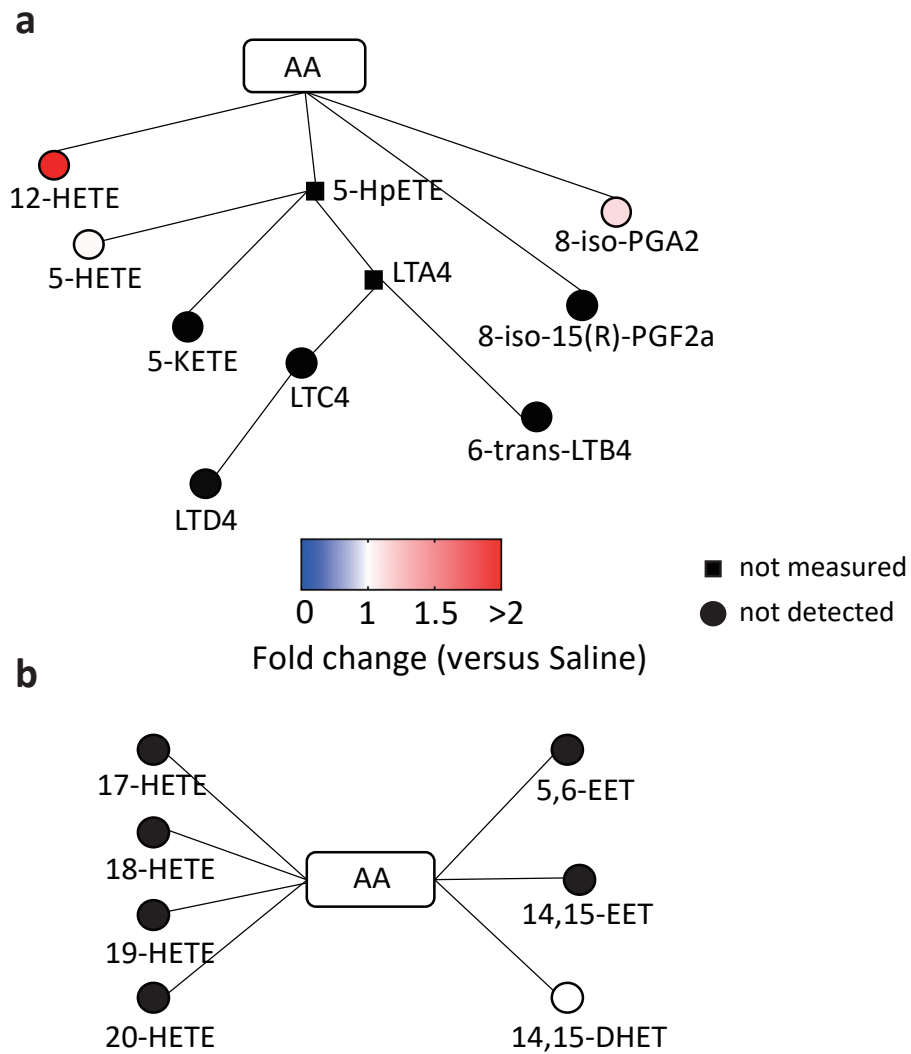

Supplementary Figure 9

Relative amounts of hypothalamic eicosanoids mediated by lipoxygenase (a) or cytochrome P450 (b) in RCD or HFD fed mice. n=3 each experimental group. Data represent the mean fold change in color.

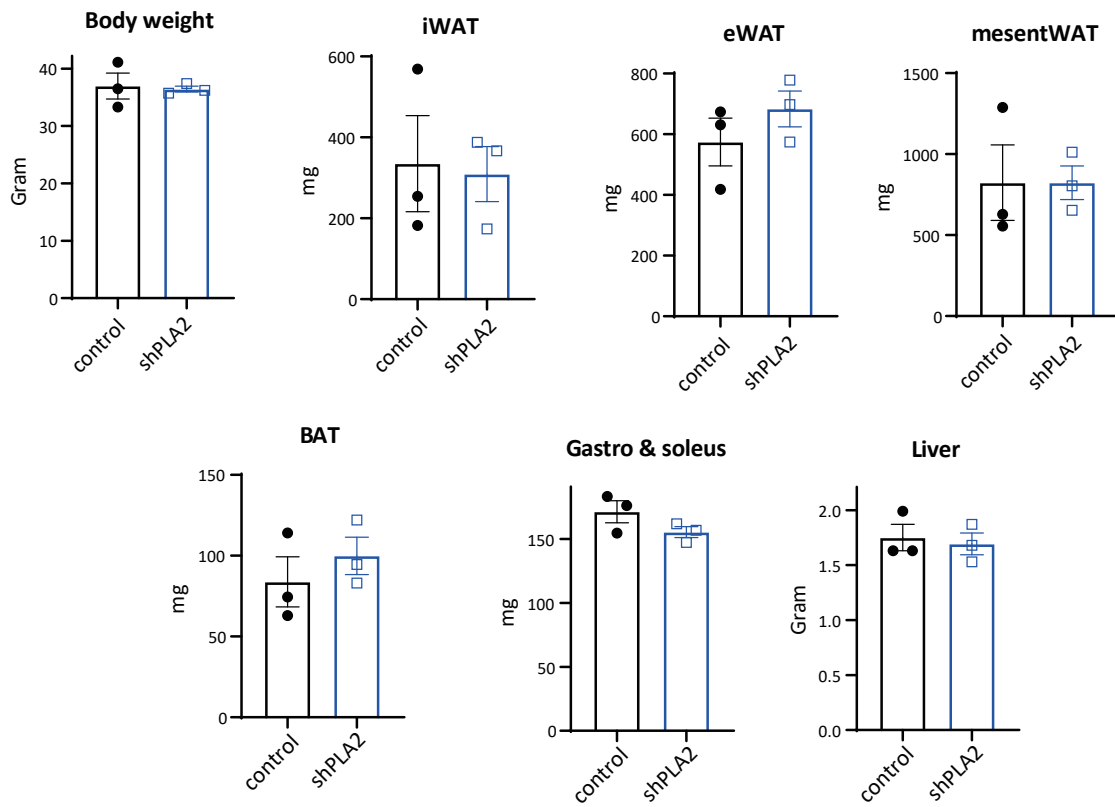

Supplementary Figure 10

Body weight and tissue weight in male cPLA2KD<sup>Sf1</sup> mice (n=3) and GFP<sup>Sf1</sup> mice (n=3) after 8 weeks of a HFD feeding. (iWAT: inguinal white adipose tissue. eWAT: epididymal white adipose tissue. mesentWAT: mesenteric white adipose tissue. BAT: brown adipose tissue). All data represent the mean  $\pm$  SEM.

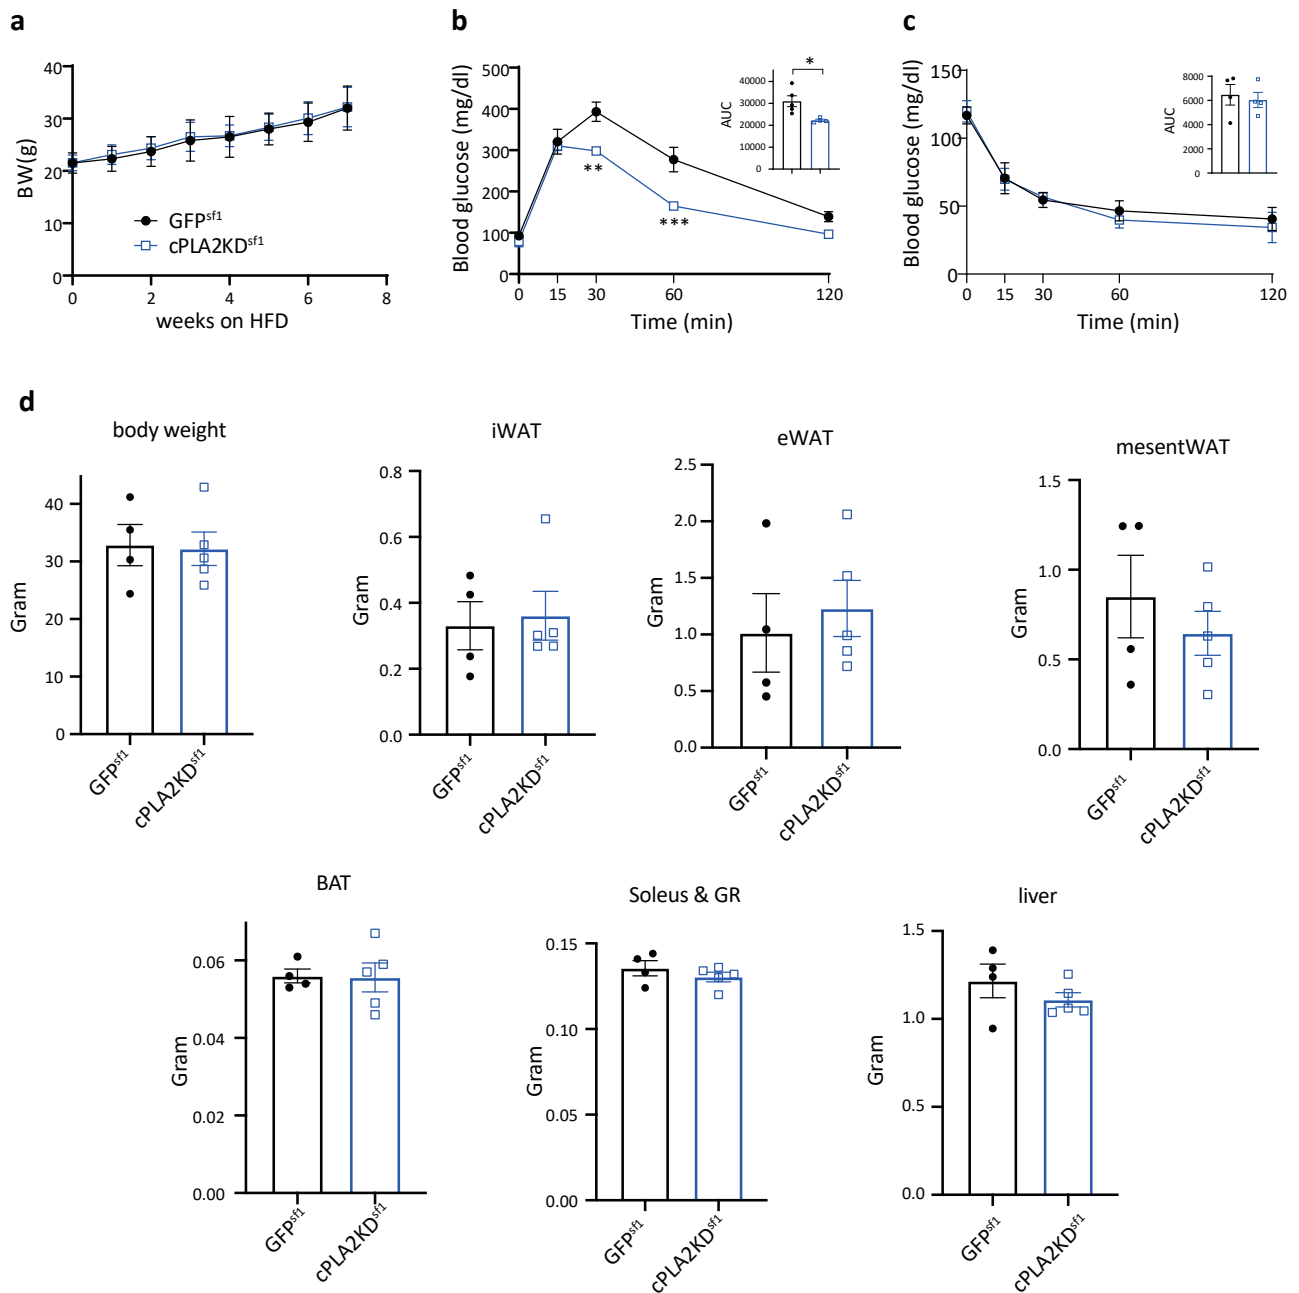

Supplementary Figure 11

Knockdown of cPLA2 improves HFD-induced impairment of glucose metabolism in female mice. a, Body weight change in female cPLA2KD<sup>Sf1</sup> mice (n=4) and GFP<sup>Sf1</sup> mice (n=4) under HFD. b, Glucose tolerance test on female cPLA2KD<sup>Sf1</sup> mice (n=4) and GFP<sup>Sf1</sup> mice (n=5). (two-way ANOVA followed by Sidak multiple comparison test,  $p = 0.0059$  at time = 30,  $p = 0.0009$  at time = 60, GFP<sup>Sf1</sup> vs cPLA2KD<sup>Sf1</sup>. two-tailed t test in area under the curve (AUC) during GTT,  $p = 0.0177$ , GFP<sup>Sf1</sup> vs cPLA2KD<sup>Sf1</sup>). c, Insulin tolerance test on cPLA2KD<sup>Sf1</sup> (n=4) mice and GFP<sup>Sf1</sup> mice (n=4) after 8 weeks of HFD feeding. d, Body weight and tissue weight in cPLA2KD<sup>Sf1</sup> mice (n=5) and GFP<sup>Sf1</sup> mice (n=4) after 8 weeks of HFD feeding. (iWAT: inguinal white adipose tissue. eWAT: epididymal white adipose tissue. mesentWAT: mesenteric white adipose tissue. BAT: brown adipose tissue.) All data represent the mean  $\pm$  SEM; \* =  $p < 0.05$ ; \*\* =  $p < 0.01$ ; \*\*\* =  $p < 0.001$ .

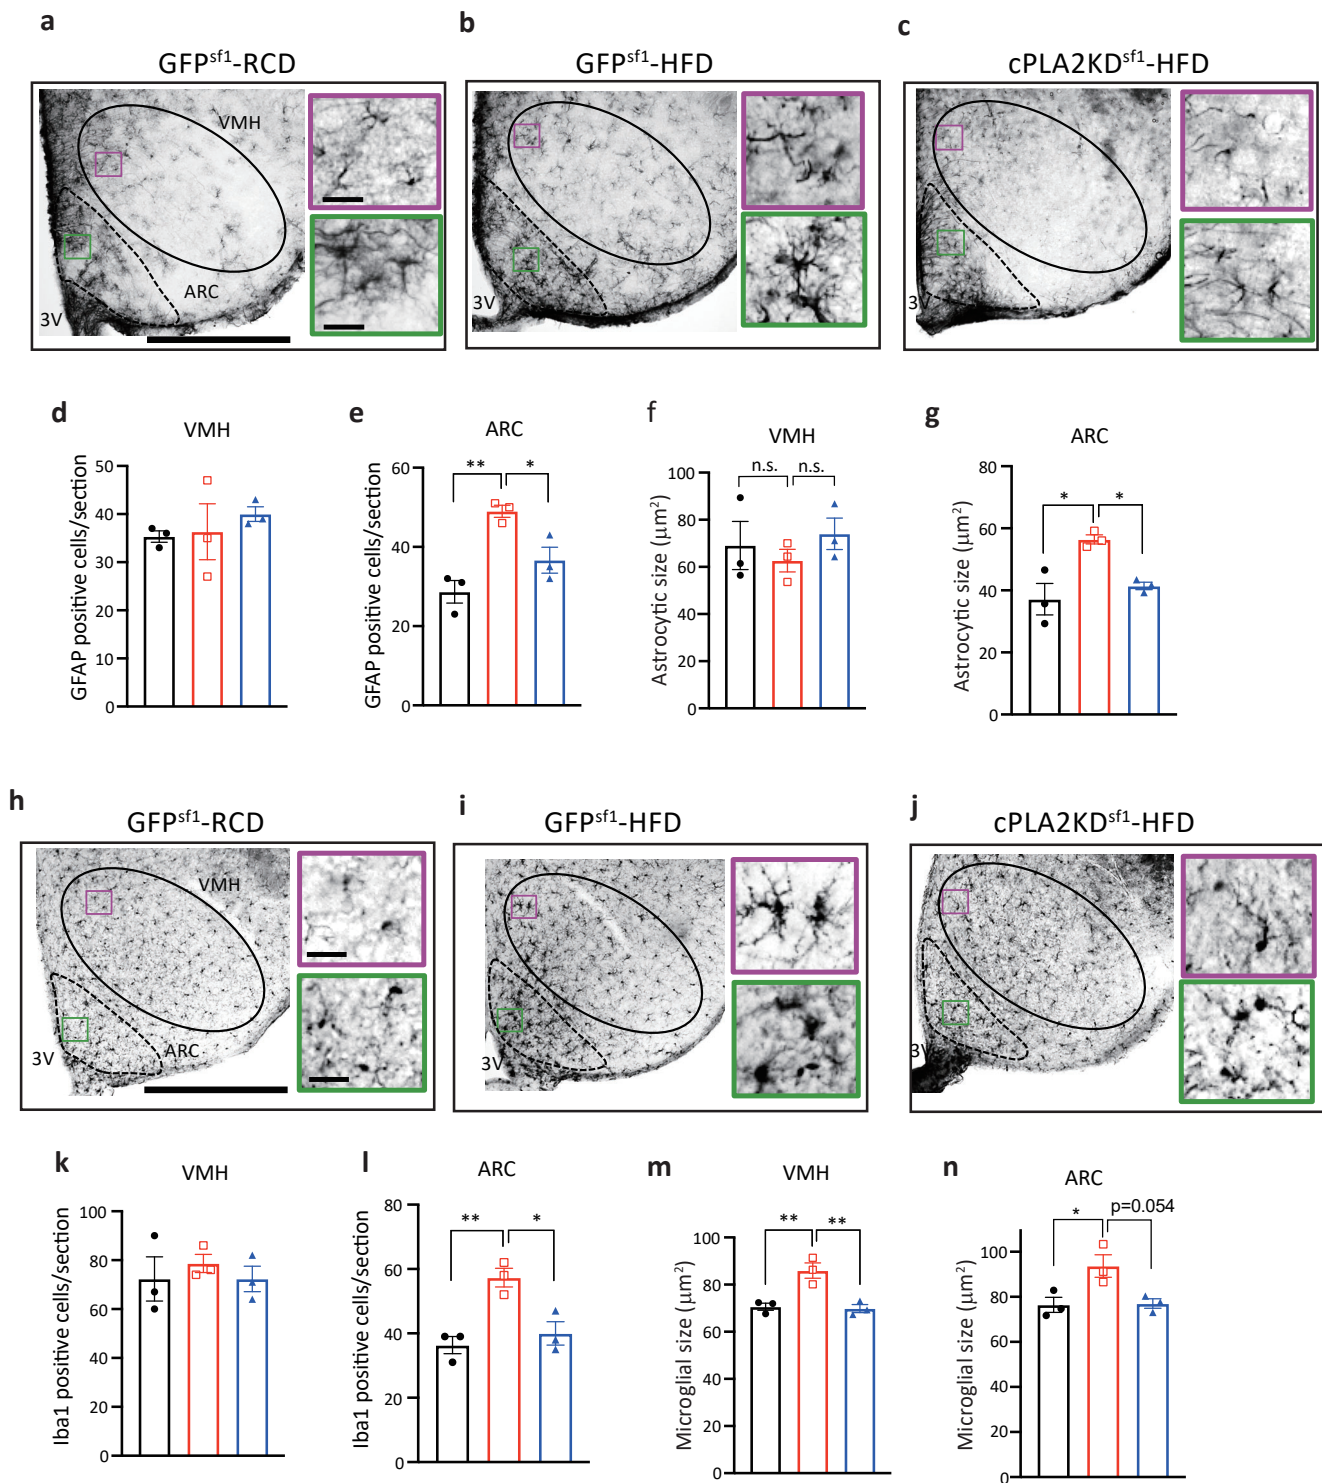

Supplementary Figure 12

Knockdown of cPLA2 prevents HFD-induced microgliosis and astrogliosis in female mice.

a-c, Left: Representative micrographs showing immunofluorescent GFAP staining in the hypothalamus of RCD-fed GFP<sup>Sf1</sup> mice (GFP<sup>Sf1</sup>-RCD) (a), HFD-fed GFP<sup>Sf1</sup> mice (GFP<sup>Sf1</sup>-HFD) (b) and HFD-fed cPLA2KD<sup>Sf1</sup> (cPLA2KD<sup>Sf1</sup>-HFD) mice (c). Scale bar: 500  $\mu$ m. Right: magnified rectangles showed in left. Scale bar: 30  $\mu$ m. d,e, Quantification of GFAP-positive cells in the VMH (d) or ARC (e) of GFP<sup>Sf1</sup>-RCD (n=3), GFP<sup>Sf1</sup>-HFD (n=3) and cPLA2KD<sup>Sf1</sup>-HFD (n=3) mice (one-way ANOVA followed by Sidak multiple comparison test, in e,  $p = 0.005$  GFP<sup>Sf1</sup> RCD vs GFP<sup>Sf1</sup> HFD,  $p = 0.0497$  GFP<sup>Sf1</sup> HFD vs cPLA2KD<sup>Sf1</sup> HFD). f,g, Size of GFAP positive cells in in the VMH (f) or ARC (g) of GFP<sup>Sf1</sup>-RCD (n=3), GFP<sup>Sf1</sup>-HFD (n=3) and cPLA2KD<sup>Sf1</sup>-HFD (n=3) mice (one-way ANOVA followed by Sidak multiple comparison test, in g,  $p = 0.0004$  GFP<sup>Sf1</sup> RCD vs GFP<sup>Sf1</sup> HFD,  $p = 0.0128$  GFP<sup>Sf1</sup> HFD vs cPLA2KD<sup>Sf1</sup> HFD). h-j, Left: Representative micrographs showing immunohistochemistry Iba1 staining in the hypothalamus of GFP<sup>Sf1</sup>-RCD (h), GFP<sup>Sf1</sup>-HFD (i) and cPLA2KD<sup>Sf1</sup>-HFD mice (j). Scale bar: 500  $\mu$ m. Right: magnified rectangles showed in left. Scale bar: 30  $\mu$ m. k,l, Quantification of Iba1-positive cells in the VMH (k) or ARC (l) of GFP<sup>Sf1</sup>-RCD (n=3), GFP<sup>Sf1</sup>-HFD (n=3) and cPLA2KD<sup>Sf1</sup>-HFD (n=3) mice (one-way ANOVA followed by Sidak multiple comparison test, in l,  $p = 0.0089$  GFP<sup>Sf1</sup> RCD vs GFP<sup>Sf1</sup> HFD,  $p = 0.0219$  GFP<sup>Sf1</sup> HFD vs cPLA2KD<sup>Sf1</sup> HFD). m,n, Size of Iba1 positive cells in in the VMH (m) or ARC (n) of GFP<sup>Sf1</sup>-RCD (n=3), GFP<sup>Sf1</sup>-HFD (n=3) and cPLA2KD<sup>Sf1</sup>-HFD (n=3) mice (one-way ANOVA followed by Sidak multiple comparison test, in m,  $p = 0.0162$  GFP<sup>Sf1</sup> RCD vs GFP<sup>Sf1</sup> HFD,  $p = 0.0077$  GFP<sup>Sf1</sup> HFD vs cPLA2KD<sup>Sf1</sup> HFD, in n,  $p = 0.0042$  GFP<sup>Sf1</sup> RCD vs GFP<sup>Sf1</sup> HFD,  $p = 0.0038$  GFP<sup>Sf1</sup> HFD vs cPLA2KD<sup>Sf1</sup> HFD). All data represent the mean  $\pm$  SEM; \* =  $p < 0.05$ ; \*\* =  $p < 0.01$ .

Supplementary table 1 List of reagents and resources

| REAGENT or RESOURCE                                                              | SOURCE                      | IDENTIFIER    |
|----------------------------------------------------------------------------------|-----------------------------|---------------|
| <b>Antibodies</b>                                                                |                             |               |
| Rabbit-anti-cFos                                                                 | Santa Cruz                  | CAT#SC-52     |
| Rabbit-anti-Iba1                                                                 | FUJIFILM Wako               | CAT#LKN5648   |
| Rabbit-anti-GFAP                                                                 | Sigma-Aldrich               | CAT#HPA056030 |
| Rabbit-anti-GFP                                                                  | Frontier institute          | AB_2571573    |
| Rabbit-anti-pSTAT3 (Tyr 705) antibody                                            | Cell Signaling Technologies | 9145S         |
| Phospho-cPLA2 (Ser505) Antibody                                                  | Cell Signaling Technologies | 2831S         |
| cPLA2 Antibody                                                                   | Cell Signaling Technologies | 2832S         |
| Streptavidin, DyLight 488 Conjugated                                             | Vector Biolabs              | SA-5488       |
| Biotinylated-Goat-Anti-Rabbit (IgG) secondary antibody                           | Thermo Fisher Scientific    | A11034        |
| Anti-rabbit IgG (H+L), F(ab') <sub>2</sub> Fragment (Alexa Fluor 647 Conjugate)  | Cell Signaling Technologies | 4414S         |
| Anti-rabbit IgG (H+L), F(ab') <sub>2</sub> Fragment (Alexa Fluor® 488 Conjugate) | Cell Signaling Technologies | 4412S         |
| <b>Bacterial and Virus Strains</b>                                               |                             |               |
| AAV8-DIO (Cre-On)-shRNA against <i>mpla2g4</i>                                   | Vigene                      | Custom made   |
| AAV8-GFAP-mcherry-Cre                                                            | UNC Vector Core             | Lot# AV5056C  |
| <b>Chemicals, Peptides, and Recombinant Proteins</b>                             |                             |               |
| 9-Aminoacridine hemihydrate                                                      | Thermo Fisher Scientific    | 134410010     |
| Glucose                                                                          | FUJIFILM Wako               | 049-31165     |
| Novolin R 100 IU                                                                 | Novo Nordisk                | N/A           |
| Glucose-D-[3- <sup>3</sup> H]                                                    | Muromachi Kikai             | ART0124       |
| 2-Deoxy-D-glucose <sup>14</sup> C(U)                                             | Muromachi Kikai             | ARC0112A      |
| Methyl arachidonyl fluorophosphonate (MAFP)                                      | Sigma-Aldrich               | M2939         |
| Indomethacin (Indo)                                                              | Sigma-Aldrich               | I7378         |
| Ethanol                                                                          | FUJIFILM Wako               | 056-03341     |
| Dimethyl sulfoxide                                                               | Nacalai Tesque              | 13407         |
| TRIzol™ reagent                                                                  | Thermo Fisher Scientific    | 15596026      |
| <b>Critical Commercial Assays</b>                                                |                             |               |
| Mouse Insulin ELISA KIT                                                          | FUJIFILM Wako               | 633-23919     |
| Cytosolic Phospholipase A2 Assay Kit                                             | Abcam                       | Ab133090      |
| Secretory-phospholipase-A2 Assay Kit                                             | Abcam                       | Ab133089      |
| TaqMan™ Gene Expression Master Mix                                               | Thermo Fisher Scientific    | 4369016       |
| M-MLV Reverse Transcriptase                                                      | Thermo Fisher Scientific    | 28025013      |
| VECTASTAIN Elite ABC Kit                                                         | Vector Laboratories         | PK-6100       |
| DAB tablet                                                                       | FUJIFILM Wako               | 045-22833     |

Supplementary table 2

Assignment of lipid molecular species by IMS negative ion mode

| <u>Lipid assignment</u>      | <u>[M-H]<sup>-</sup>(m/z)</u> |
|------------------------------|-------------------------------|
| Palmitic acid                | 255.25                        |
| Oleic acid                   | 281.3                         |
| Stearic acid                 | 283.35                        |
| Arachidonic acid             | 303.3                         |
| DHA                          | 327.33                        |
| PE (p18:1/16:0), plasmalogen | 700.6                         |
| PE (18:0/16:1)               | 716.6                         |
| PE (p18:0/20:4), plasmalogen | 750.5                         |
| PS (18:0/16:0)               | 762.6                         |
| PE (18:0/20:4)               | 766.5                         |
| PE (18:0/22:4)               | 794.5                         |
| PS (18:0/20:4)               | 810.6                         |
| PS (18:0/22:6)               | 834.6                         |
| PI (16:0/20:4)               | 857.6                         |
| PI (18:1/20:4)               | 883.55                        |
| PI (18:0/20:4)               | 885.77                        |

|          |       |
|----------|-------|
| LPE 16:0 | 452.3 |
| LPE 18:0 | 480.3 |
| LPE 18:1 | 478.3 |
| LPE 20:4 | 500.3 |
| LPE 22:4 | 528.3 |
| LPI 16:0 | 571.3 |
| LPI 18:0 | 599.3 |
| LPI 18:1 | 597.3 |
| LPI 20:4 | 619.3 |
| LPI 22:4 | 647.3 |
| LPS 16:0 | 496.3 |
| LPS 18:0 | 524.3 |
| LPS 18:1 | 522.3 |
| LPS 20:4 | 544.3 |
| LPS 22:4 | 572.3 |
